# Supplementary material for: Circulating Micrornas Predict Survival of Patients with Tumors of Glial Origin
Source: PubMed Central journal article supplement — eBioMedicine. 2018 Mar 21;30:105–12. doi: 10.1016/j.ebiom.2018.03.022 (PMC5952410; doi:10.1016/j.ebiom.2018.03.022), 2018-03-21

Effect of miR-520f-3p expression level on Astrocytoma patient survival

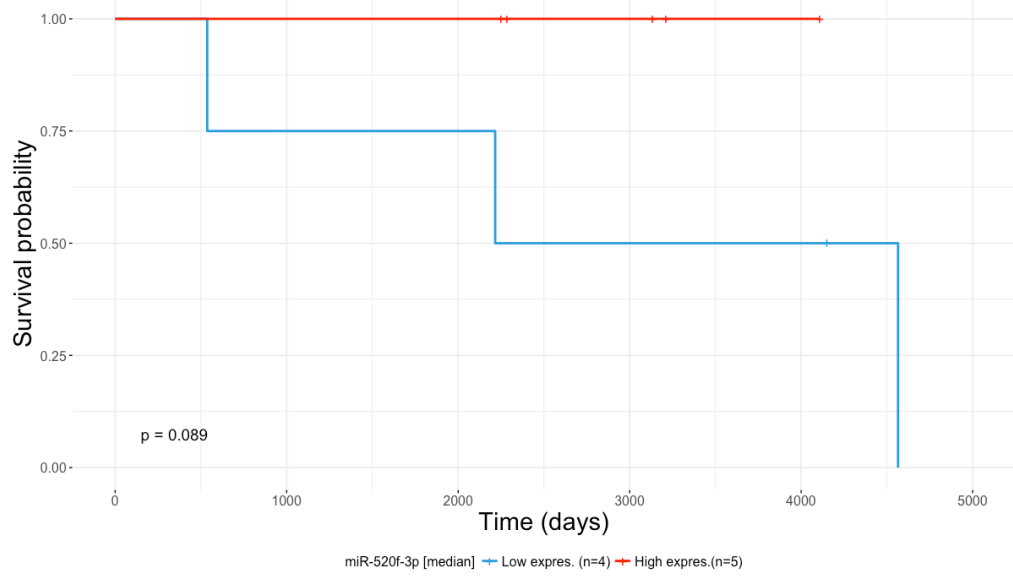

Effect of miR-422a expression level on Astrocytoma patient survival

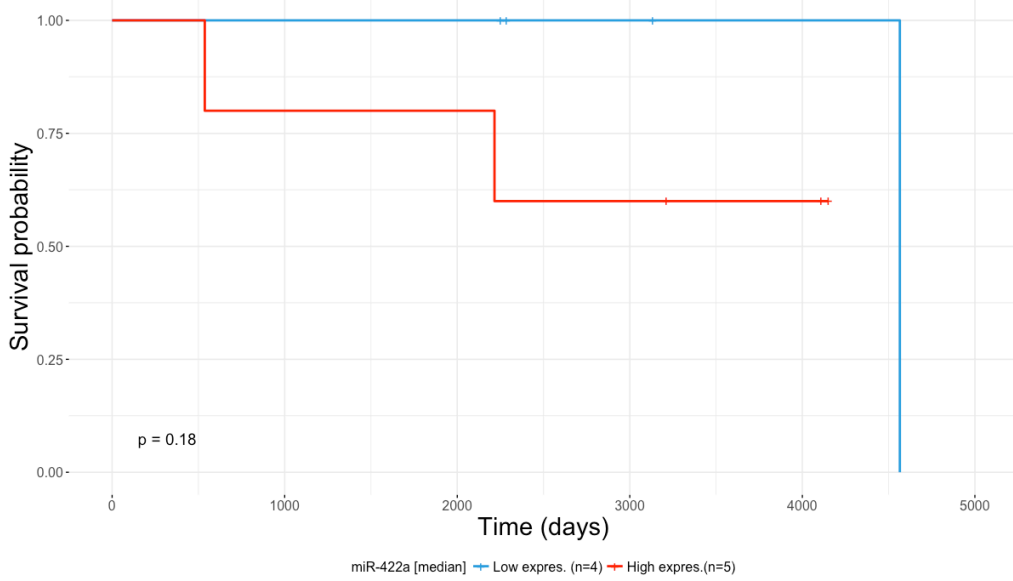

Supplement: mmc2.pdf [file mmc2.pdf]
